# Supplementary material
Source: publisher figshare collection journal article supplement (https://tandf.figshare.com/articles/dataset/_/10604243)

**Fig. S1**

# Strain history

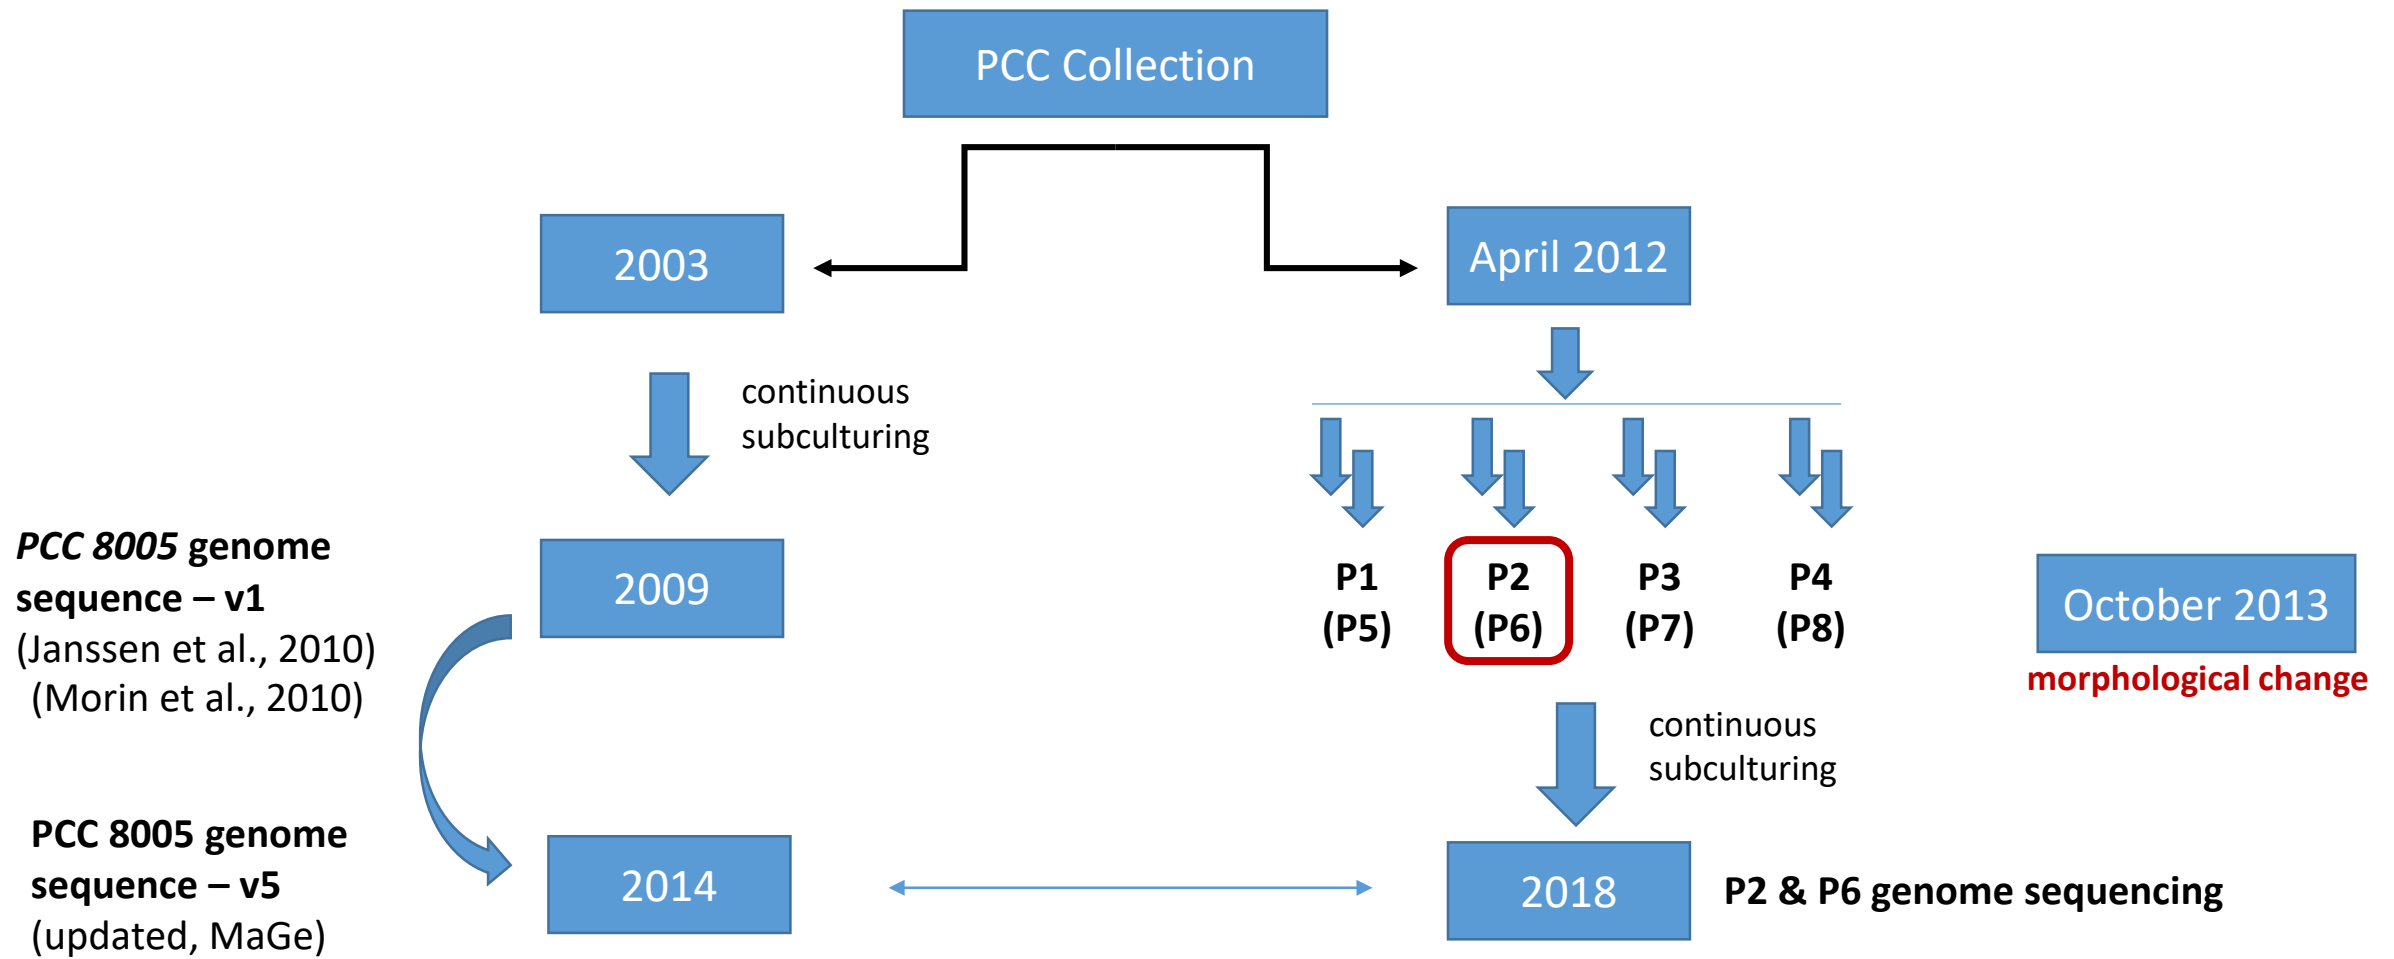

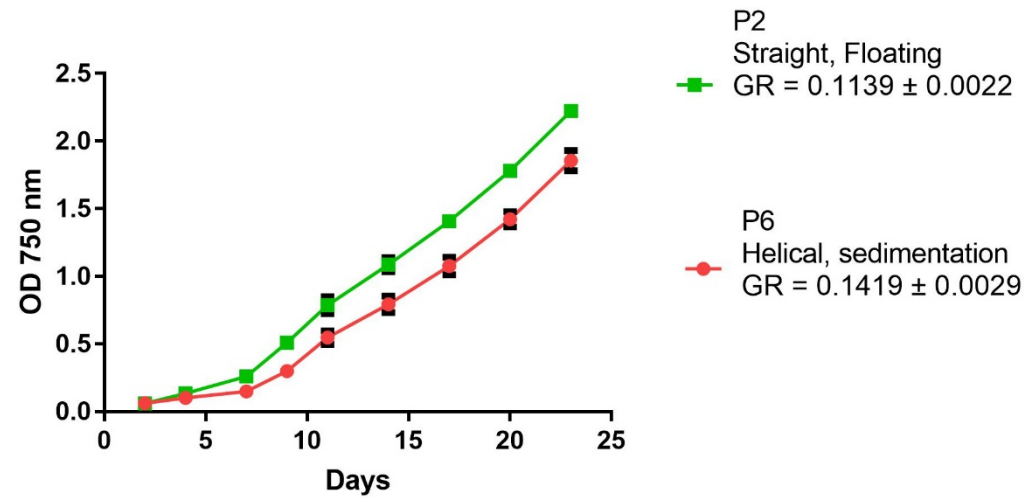

## Table S1

T2- 20<sup>th</sup> day and T1- 9<sup>th</sup> day

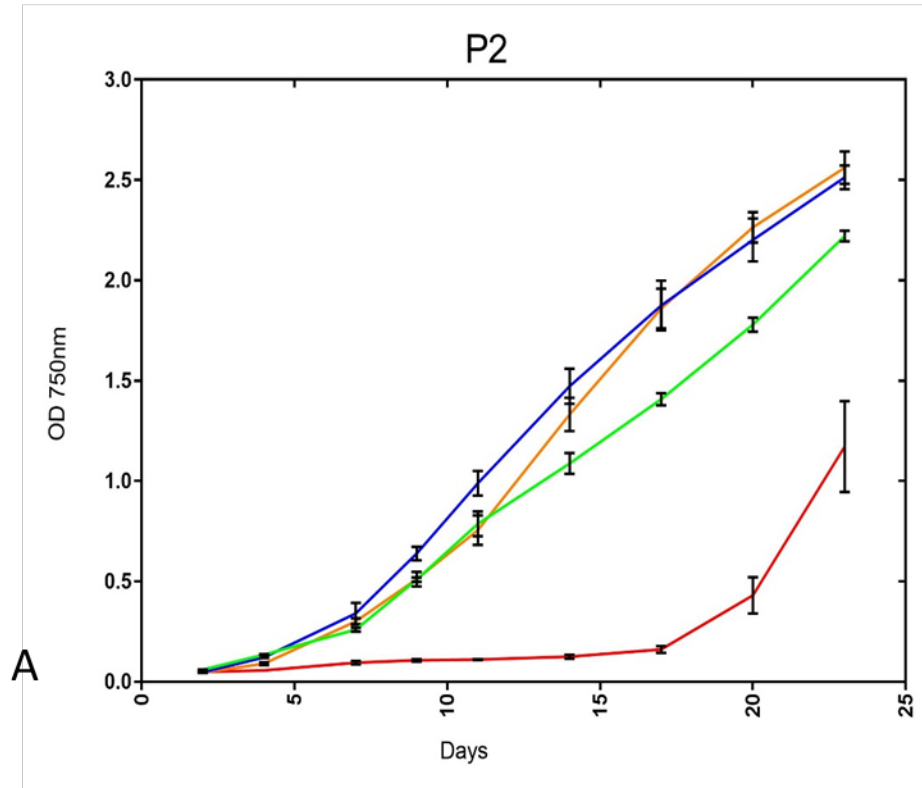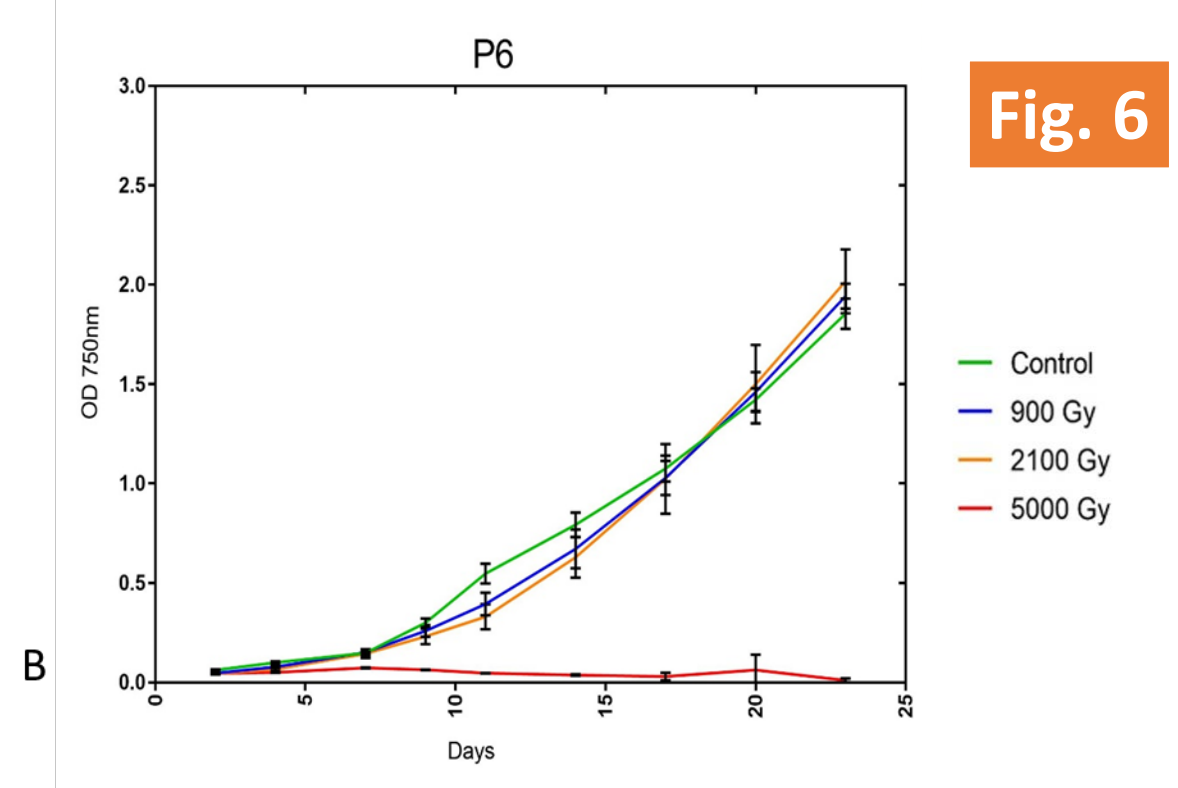

One way ANOVA was performed on the Mean values of Growth rate of Control and radiation exposed cultures, with T2 as 20<sup>th</sup> day and T1 as 9<sup>th</sup> day

**Table S2**

| Sidak's multiple comparisons test | Mean Diff, | 95,00% CI of diff,    | Significant? | Summary | Adjusted P Value |
|-----------------------------------|------------|-----------------------|--------------|---------|------------------|
| C vs. 900 Gy                      | 0,00131    | -0,02086 to 0,02348   | No           | ns      | 0,9975           |
| C vs. 2100 Gy                     | -0,02146   | -0,04363 to 0,0007138 | No           | ns      | 0,0578           |
| C vs. 5000 Gy                     | -0,01193   | -0,0341 to 0,01024    | No           | ns      | 0,3743           |

| Sidak's multiple comparisons test | Mean Diff, | 95,00% CI of diff, | Significant? | Summary | Adjusted P Value |
|-----------------------------------|------------|--------------------|--------------|---------|------------------|
| C vs. 900                         | 0,8085     | -0,07661 to 1,694  | No           | ns      | 0,0739           |
| C vs. 2100                        | 0,7955     | -0,08962 to 1,681  | No           | ns      | 0,079            |
| C vs. 5000                        | 1,019      | 0,1341 to 1,904    | Yes          | *       | 0,0255           |

O.D. VS DRY WEIGHT GRAPHS

Fig. S2

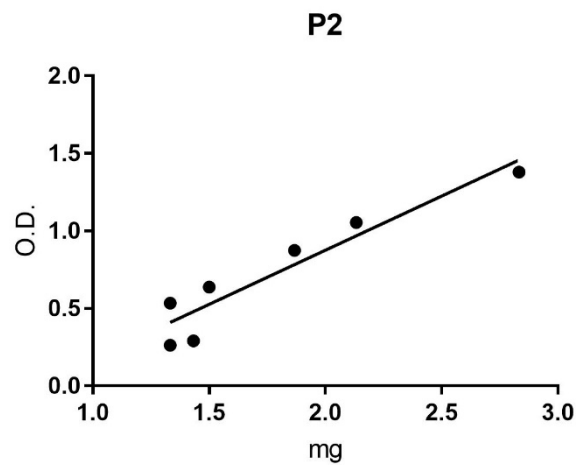

Fig. S3

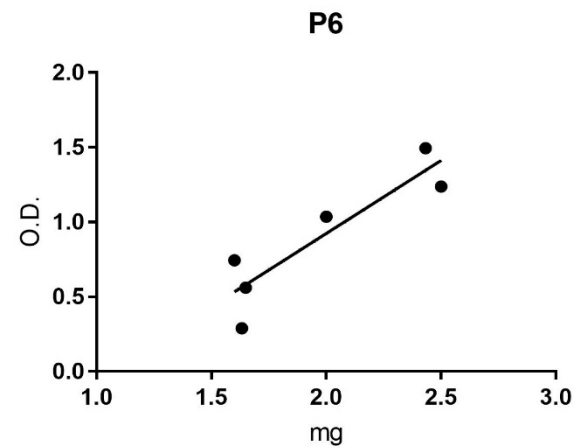

Table S3

|            |         |
|------------|---------|
| YIntercept | -0,5213 |
| Slope      | 0,6984  |
| R square   | 0,8932  |

Table S4

|            |        |
|------------|--------|
| YIntercept | -1,032 |
| Slope      | 0,9775 |
| R square   | 0,8137 |

| Glutathione and Carotenoids             | O.D.  | Dry weight calculated |
|-----------------------------------------|-------|-----------------------|
| P6                                      | 0,583 | 1,652174              |
| P2                                      | 0,802 | 1,894759              |
| TAO, PC, APC, Chlorophyll and Trehalose |       |                       |
| P6                                      | 0,831 | 1,905882              |
| P2                                      | 1,139 | 2,377291              |

Table S5

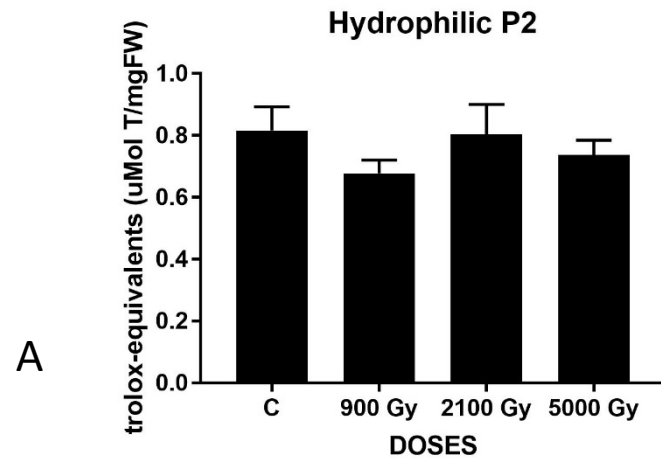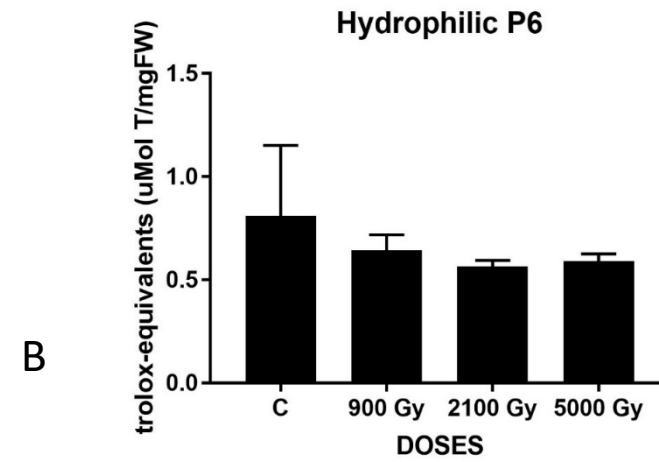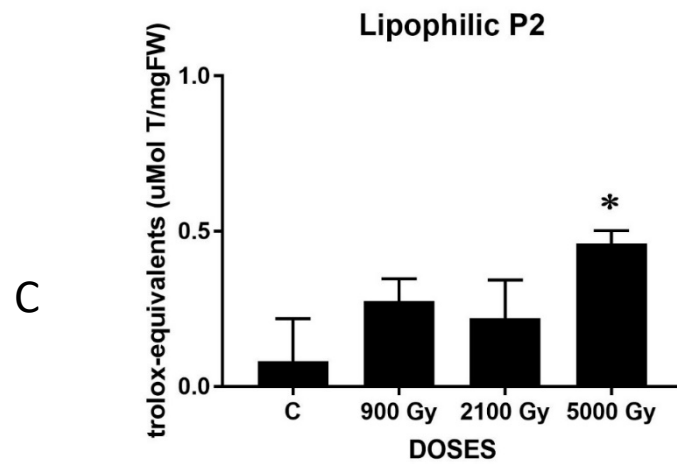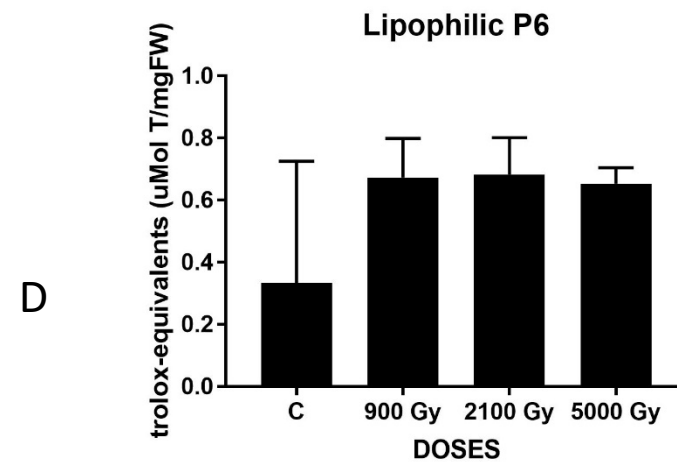

**Fig. 7**

# Table S6

| HYDROPHILIC P6                   |                 |              |                  |
|----------------------------------|-----------------|--------------|------------------|
| Dunn's multiple comparisons test | Mean rank diff, | Significant? | Adjusted P Value |
| C vs. 900 Gy                     | 0,1667          | No           | >0,9999          |
| C vs. 2100 Gy                    | 3,667           | No           | 0,634            |
| C vs. 5000 Gy                    | 2,167           | No           | >0,9999          |
| LYPHOPHILIC P6                   |                 |              |                  |
| C vs. 900 Gy                     | -2,833          | No           | >0,9999          |
| C vs. 2100 Gy                    | -3,5            | No           | 0,6985           |
| C vs. 5000 Gy                    | -2,333          | No           | >0,9999          |
| HYDROPHILIC P2                   |                 |              |                  |
| C vs. 900 Gy                     | 6,5             | No           | 0,0777           |
| C vs. 2100 Gy                    | 0,3333          | No           | >0,9999          |
| C vs. 5000 Gy                    | 3,167           | No           | 0,8335           |
| LYPHOPHILIC P2                   |                 |              |                  |
| C vs. 900 Gy                     | -3,667          | No           | 0,6388           |
| C vs. 2100 Gy                    | -2,333          | No           | >0,9999          |
| C vs. 5000 Gy                    | -8              | Yes          | 0,0197           |

**Fig. S4**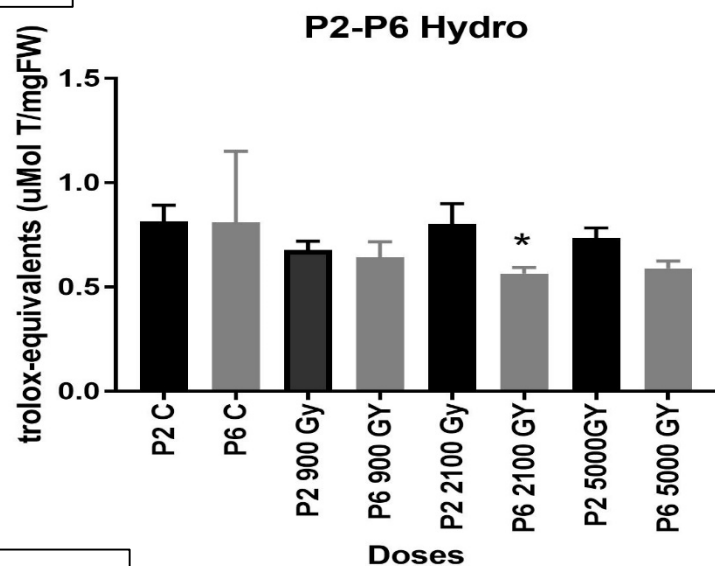**Table S7**

| Dunn's multiple comparisons test | Mean rank diff, | Significant? | Summary | Adjusted P Value |
|----------------------------------|-----------------|--------------|---------|------------------|
| P2 C vs. P6 C                    | 5               | No           | ns      | >0,9999          |
| P2 900 Gy vs. P6 900 GY          | 2,333           | No           | ns      | >0,9999          |
| P2 2100 Gy vs. P6 2100 GY        | 14,67           | Yes          | *       | 0,0438           |
| P2 5000GY vs. P6 5000 GY         | 10              | No           | ns      | 0,3312           |

**Fig. S5**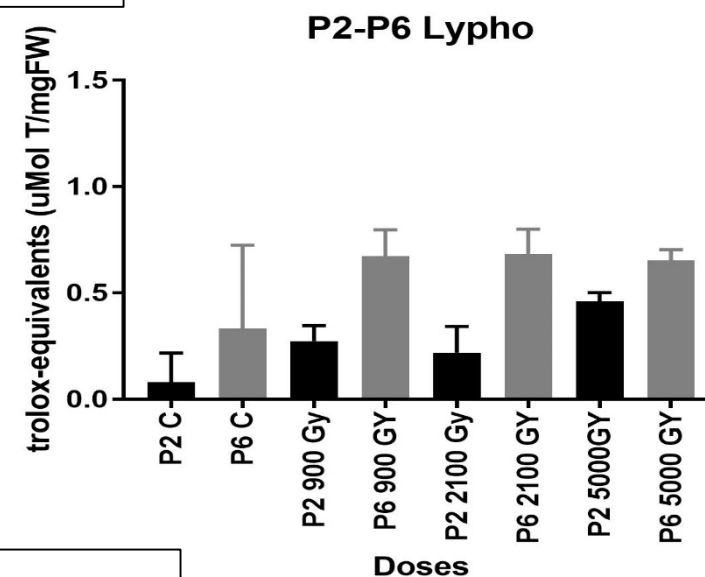**Table S8**

| Dunn's multiple comparisons test | Mean rank diff, | Significant? | Summary | Adjusted P Value |
|----------------------------------|-----------------|--------------|---------|------------------|
| P2 C vs. P6 C                    | -6,333          | No           | ns      | >0,9999          |
| P2 900 Gy vs. P6 900 GY          | -10,5           | No           | ns      | 0,2754           |
| P2 2100 Gy vs. P6 2100 GY        | -12,83          | No           | ns      | 0,1047           |
| P2 5000GY vs. P6 5000 GY         | -5,667          | No           | ns      | >0,9999          |

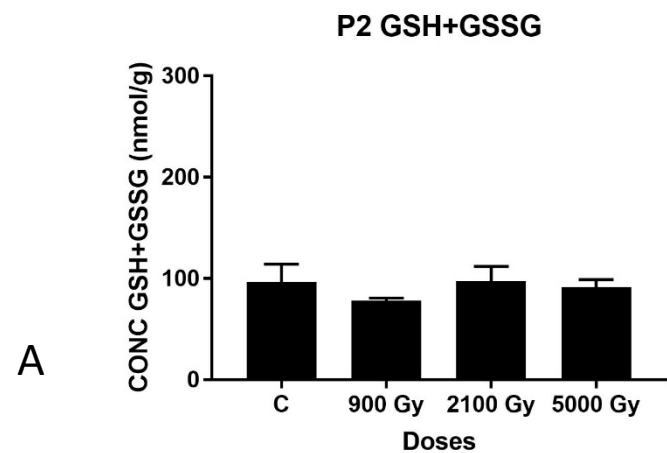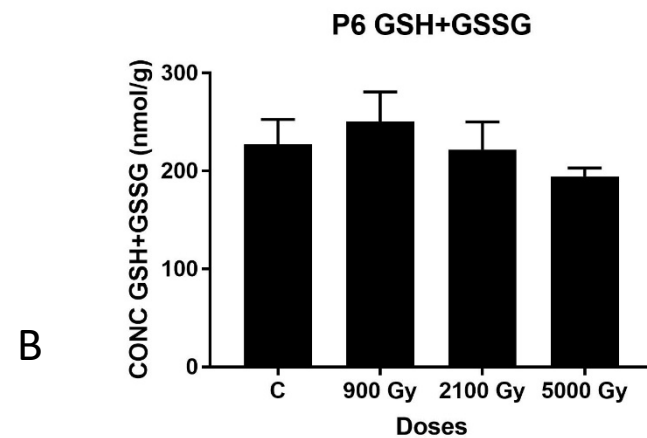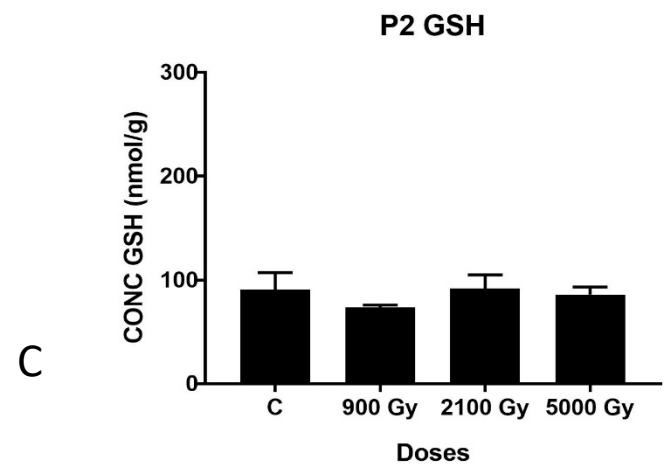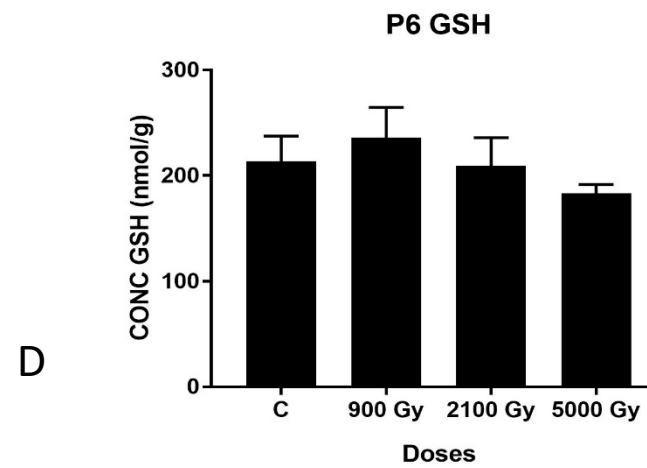

**Fig. 8**

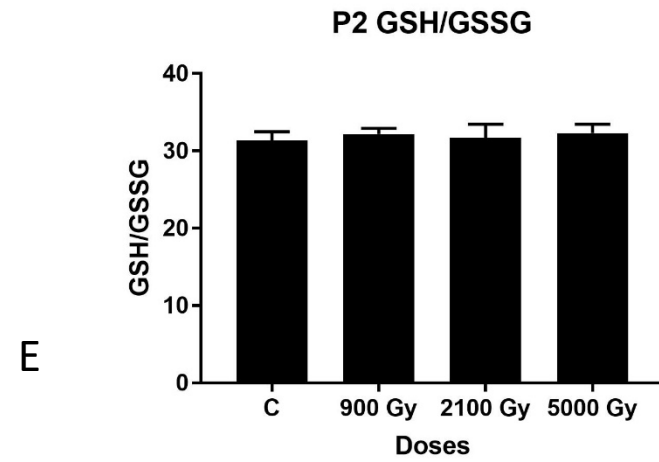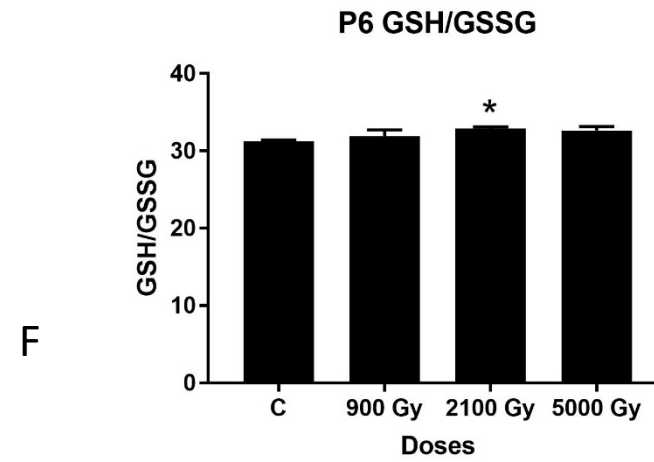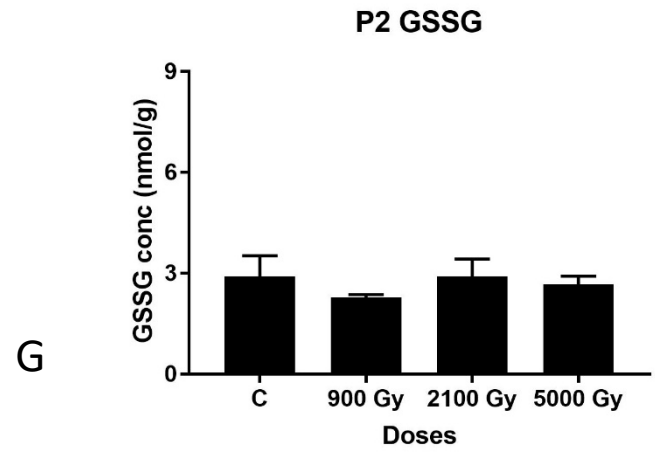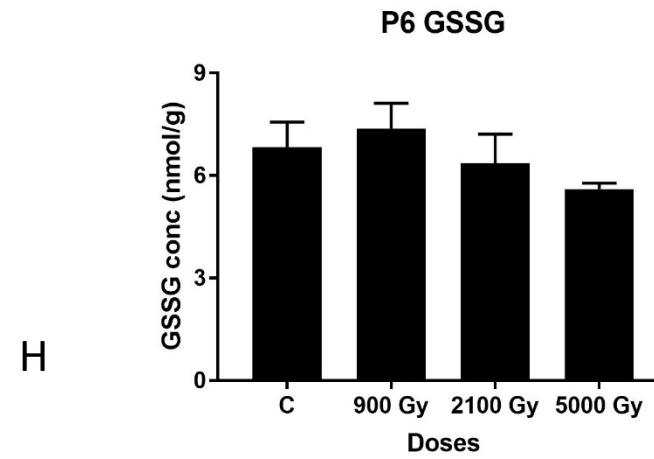

**Fig. 8**  
Continued

|                                  |                 |              |                  |
|----------------------------------|-----------------|--------------|------------------|
| <b>P2 GSH</b>                    |                 |              |                  |
| Dunn's multiple comparisons test | Mean rank diff, | Significant? | Adjusted P Value |
| C vs. 900 Gy                     | 5,333           | No           | 0,2101           |
| C vs. 2100 Gy                    | -0,3333         | No           | >0,9999          |
| C vs. 5000 Gy                    | 1               | No           | >0,9999          |
| <b>P6 GSH</b>                    |                 |              |                  |
| C vs. 900 Gy                     | -2,333          | No           | >0,9999          |
| C vs. 2100 Gy                    | 1,333           | No           | >0,9999          |
| C vs. 5000 Gy                    | 4,333           | No           | 0,4231           |
| <b>P2 GSH/GSSG</b>               |                 |              |                  |
| C vs. 900 Gy                     | -2,667          | No           | >0,9999          |
| C vs. 2100 Gy                    | -1,667          | No           | >0,9999          |
| C vs. 5000 Gy                    | -3              | No           | 0,9245           |
| <b>P6 GSH/GSSG</b>               |                 |              |                  |
| C vs. 900 Gy                     | -2,333          | No           | >0,9999          |
| C vs. 2100 Gy                    | -7,333          | Yes          | 0,0382           |
| C vs. 5000 Gy                    | -5,667          | No           | 0,1627           |
| <b>P2 GSH+GSSG</b>               |                 |              |                  |
| C vs. 900 Gy                     | 5,333           | No           | 0,2101           |
| C vs. 2100 Gy                    | -0,3333         | No           | >0,9999          |
| C vs. 5000 Gy                    | 1               | No           | >0,9999          |
| <b>P6 GSH+GSSG</b>               |                 |              |                  |
| C vs. 900 Gy                     | -2,333          | No           | >0,9999          |
| C vs. 2100 Gy                    | 1,333           | No           | >0,9999          |
| C vs. 5000 Gy                    | 4,333           | No           | 0,4231           |
| <b>P2 GSSG</b>                   |                 |              |                  |
| C vs. 900 Gy                     | 4,667           | No           | 0,3388           |
| C vs. 2100 Gy                    | -0,6667         | No           | >0,9999          |
| C vs. 5000 Gy                    | 0,6667          | No           | >0,9999          |
| <b>P6 GSSG</b>                   |                 |              |                  |
| C vs. 900 Gy                     | -1,667          | No           | >0,9999          |
| C vs. 2100 Gy                    | 2,667           | No           | >0,9999          |
| C vs. 5000 Gy                    | 5               | No           | 0,2683           |

Table S9

Fig. S6

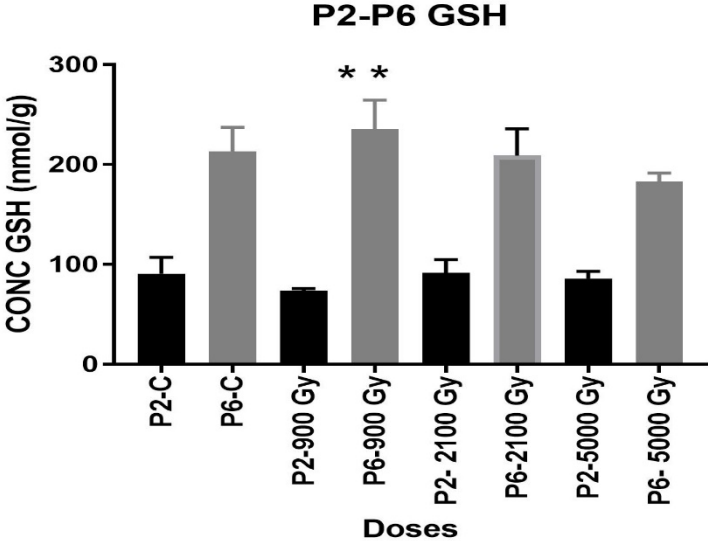

Table S10

| Dunn's multiple comparisons test | Mean rank diff, | Significant? | Summary | Adjusted P Value |
|----------------------------------|-----------------|--------------|---------|------------------|
| P2-C vs. P6-C                    | -11,33          | No           | ns      | 0,1986           |
| P2-900 Gy vs. P6-900 Gy          | -19             | Yes          | **      | 0,004            |
| P2- 2100 Gy vs. P6-2100 Gy       | -9,667          | No           | ns      | 0,3763           |
| P2-5000 Gy vs. P6- 5000 Gy       | -8              | No           | ns      | 0,6634           |

Fig. S7

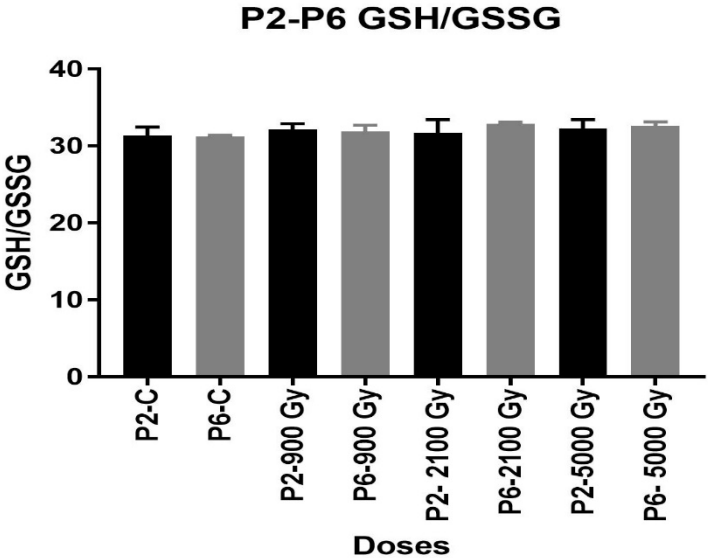

Table S11

| Dunn's multiple comparisons test | Mean rank diff, | Significant? | Summary | Adjusted P Value |
|----------------------------------|-----------------|--------------|---------|------------------|
| P2-C vs. P6-C                    | 1,333           | No           | ns      | >0,9999          |
| P2-900 Gy vs. P6-900 Gy          | 2,667           | No           | ns      | >0,9999          |
| P2- 2100 Gy vs. P6-2100 Gy       | -7,333          | No           | ns      | 0,8161           |
| P2-5000 Gy vs. P6- 5000 Gy       | -2,667          | No           | ns      | >0,9999          |

Fig. S8

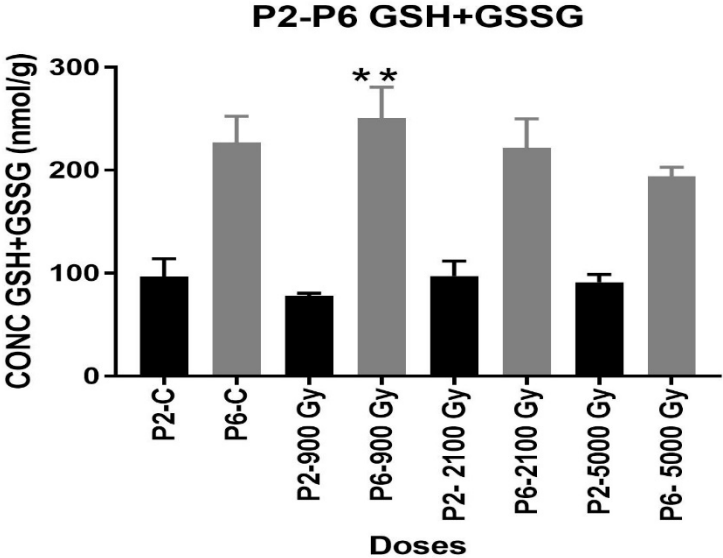

Table S12

| Dunn's multiple comparisons test | Mean rank diff, | Significant? | Summary | Adjusted P Value |
|----------------------------------|-----------------|--------------|---------|------------------|
| P2-C vs. P6-C                    | -11,33          | No           | ns      | 0,1986           |
| P2-900 Gy vs. P6-900 Gy          | -19             | Yes          | **      | 0,004            |
| P2- 2100 Gy vs. P6-2100 Gy       | -9,667          | No           | ns      | 0,3763           |
| P2-5000 Gy vs. P6- 5000 Gy       | -8              | No           | ns      | 0,6634           |

Fig. S9

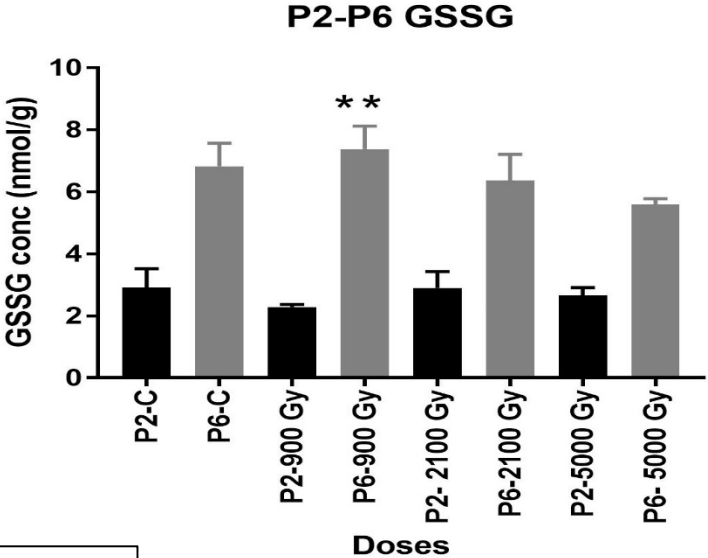

Table S13

| Dunn's multiple comparisons test | Mean rank diff, | Significant? | Summary | Adjusted P Value |
|----------------------------------|-----------------|--------------|---------|------------------|
| P2-C vs. P6-C                    | -12,33          | No           | ns      | 0,1307           |
| P2-900 Gy vs. P6-900 Gy          | -18,67          | Yes          | **      | 0,0049           |
| P2- 2100 Gy vs. P6-2100 Gy       | -9              | No           | ns      | 0,4761           |
| P2-5000 Gy vs. P6- 5000 Gy       | -8              | No           | ns      | 0,6634           |

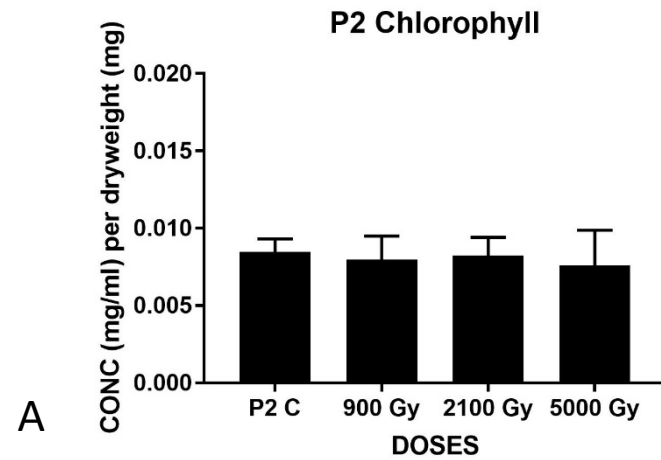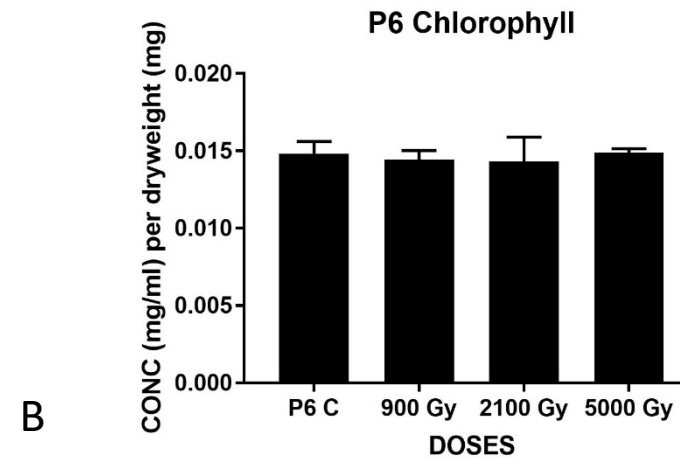

**Fig. 9**

| P6 CHLOROPHYLL                   |                 |              |         |                  |
|----------------------------------|-----------------|--------------|---------|------------------|
| Dunn's multiple comparisons test | Mean rank diff, | Significant? | Summary | Adjusted P Value |
| P6 C vs. 900 Gy                  | 3               | No           | ns      | 0,9245           |
| P6 C vs. 2100 Gy                 | 2,333           | No           | ns      | >0,9999          |
| P6 C vs. 5000 Gy                 | 0,6667          | No           | ns      | >0,9999          |
| P2 CHLOROPHYLL                   |                 |              |         |                  |
| P2 C vs. 900 Gy                  | 1,667           | No           | ns      | >0,9999          |
| P2 C vs. 2100 Gy                 | 1               | No           | ns      | >0,9999          |
| P2 C vs. 5000 Gy                 | 2               | No           | ns      | >0,9999          |

**Table S14**

CHLOROPHYLL

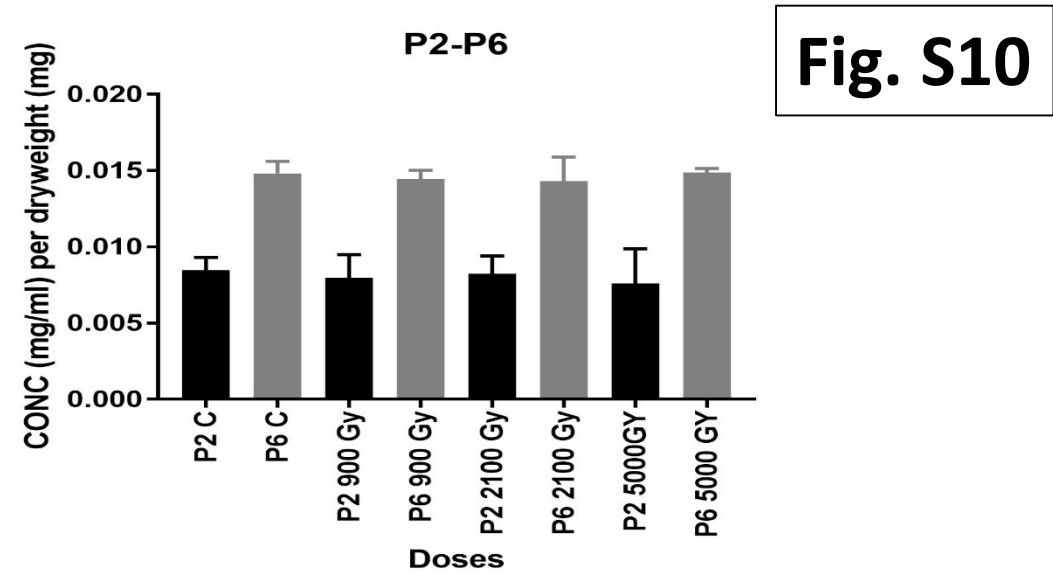

| Dunn's multiple comparisons test | Mean rank diff, | Significant? | Summary | Adjusted P Value |  |
|----------------------------------|-----------------|--------------|---------|------------------|--|
| P2 C vs. P6 C                    | -12,33          | No           | ns      | 0,1307           |  |
| P2 900 Gy vs. P6 900 Gy          | -11             | No           | ns      | 0,227            |  |
| P2 2100 Gy vs. P6 2100 Gy        | -11             | No           | ns      | 0,227            |  |
| P2 5000GY vs. P6 5000 GY         | -13,67          | No           | ns      | 0,0717           |  |

**Table S15**

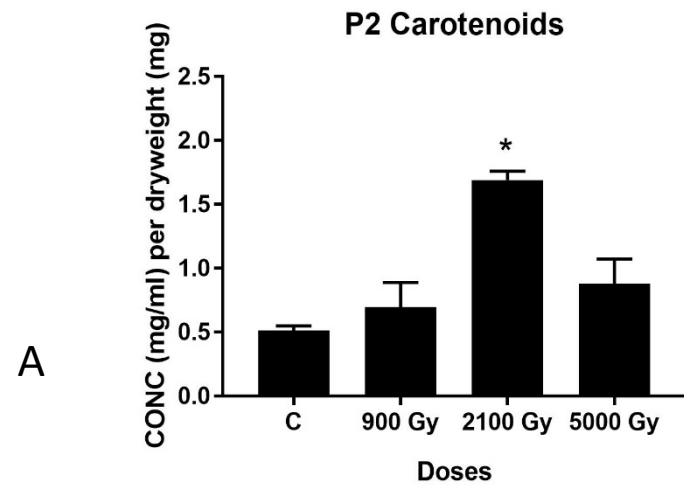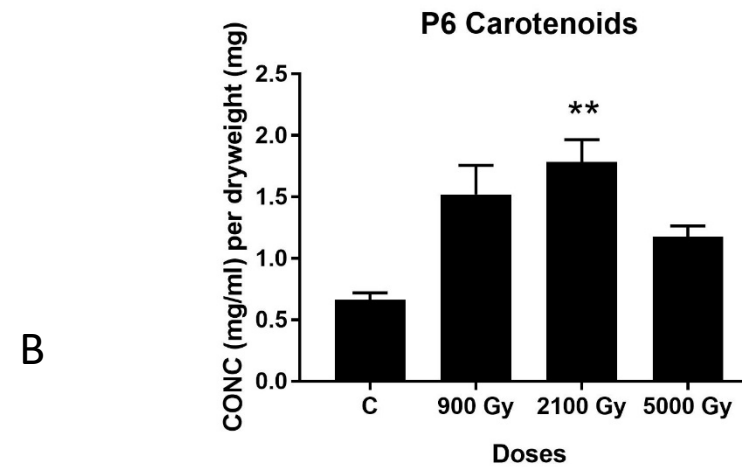

**Fig. 10**

**Table S16**

| Dunn's multiple comparisons test | Mean rank diff, | Significant? | Adjusted P Value |
|----------------------------------|-----------------|--------------|------------------|
| C vs. 900 Gy                     | -2,333          | No           | >0,9999          |
| C vs. 2100 Gy                    | -8,333          | Yes          | 0,0139           |
| C vs. 5000 Gy                    | -4,667          | No           | 0,3388           |

**Table S17**

| Dunn's multiple comparisons test | Mean rank diff, | Significant? | Adjusted P Value |
|----------------------------------|-----------------|--------------|------------------|
| C vs. 900 Gy                     | -6,333          | No           | 0,0944           |
| C vs. 2100 Gy                    | -8,667          | Yes          | 0,0097           |
| C vs. 5000 Gy                    | -3              | No           | 0,9245           |

CAROTENOIDS

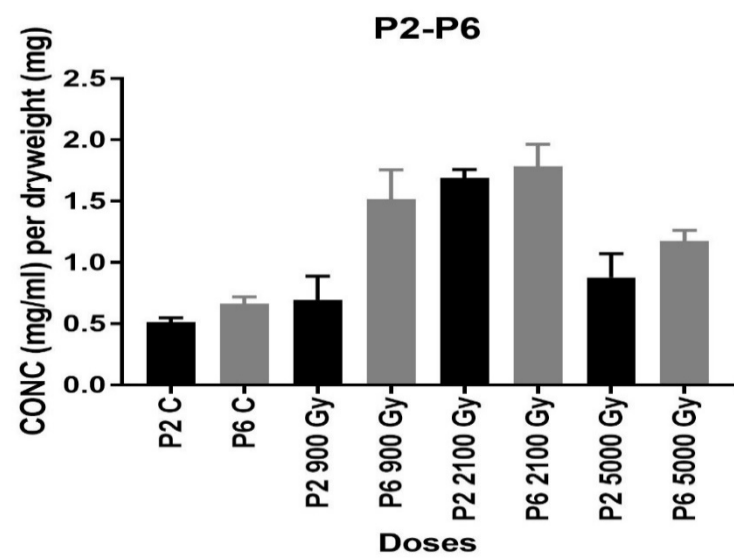

**Fig. S11**

| Dunn's multiple comparisons test | Mean rank diff, | Significant? | Summary | Adjusted P Value |
|----------------------------------|-----------------|--------------|---------|------------------|
| P2 C vs. P6 C                    | -4              | No           | ns      | >0,9999          |
| P2 900 Gy vs. P6 900 Gy          | -11,33          | No           | ns      | 0,1986           |
| P2 2100 Gy vs. P6 2100 Gy        | -1,333          | No           | ns      | >0,9999          |
| P2 5000 Gy vs. P6 5000 Gy        | -4              | No           | ns      | >0,9999          |

**Table S18**

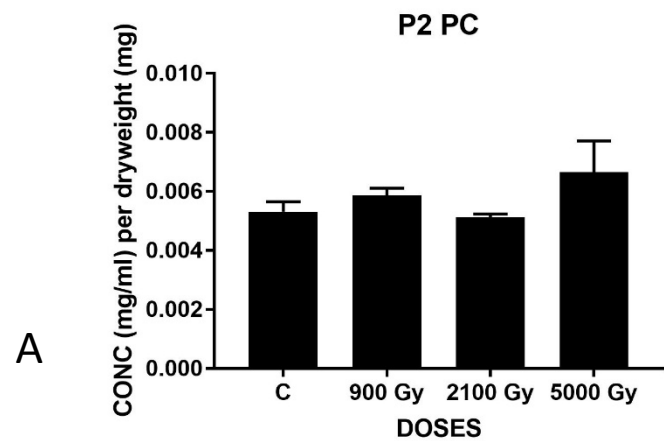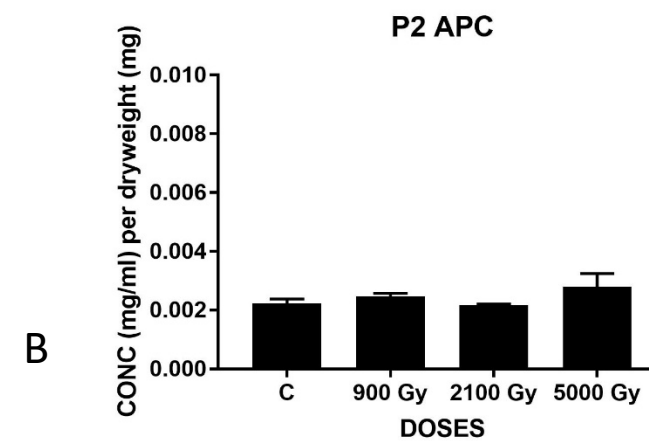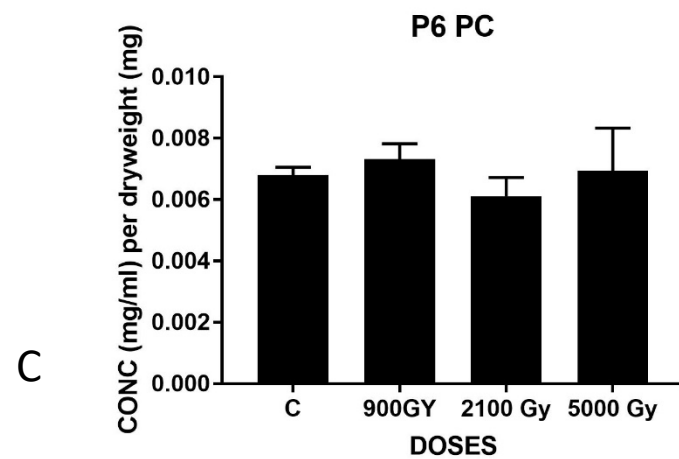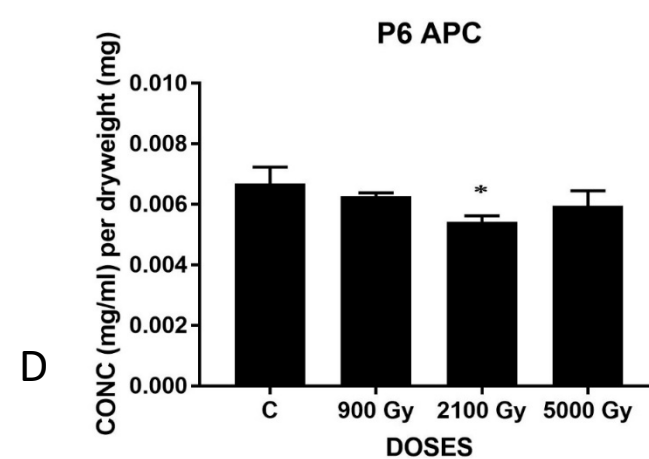

**Fig. 11**

**Table S19**

|                                  |                 |              |                  |
|----------------------------------|-----------------|--------------|------------------|
| <b>P6 PC</b>                     |                 |              |                  |
| Dunn's multiple comparisons test | Mean rank diff, | Significant? | Adjusted P Value |
|                                  |                 |              |                  |
| C vs. 900Gy                      | -2,667          | No           | >0,9999          |
| C vs. 2100 Gy                    | 3,667           | No           | 0,6388           |
| C vs. 5000 Gy                    | -1,667          | No           | >0,9999          |
|                                  |                 |              |                  |
| <b>P6 APC</b>                    |                 |              |                  |
| C vs. 900 Gy                     | 1,667           | No           | >0,9999          |
| C vs. 2100 Gy                    | 7,333           | Yes          | 0,0382           |
| C vs. 5000 Gy                    | 3,667           | No           | 0,6388           |
|                                  |                 |              |                  |
| <b>P2 PC</b>                     |                 |              |                  |
| C vs. 900 Gy                     | -5              | No           | 0,2683           |
| C vs. 2100 Gy                    | 1               | No           | >0,9999          |
| C vs. 5000 Gy                    | -6              | No           | 0,1246           |
|                                  |                 |              |                  |
| <b>P2 APC</b>                    |                 |              |                  |
| C vs. 900 Gy                     | -5              | No           | 0,2683           |
| C vs. 2100 Gy                    | 1               | No           | >0,9999          |
| C vs. 5000 Gy                    | -6              | No           | 0,1246           |

**Fig. S12**

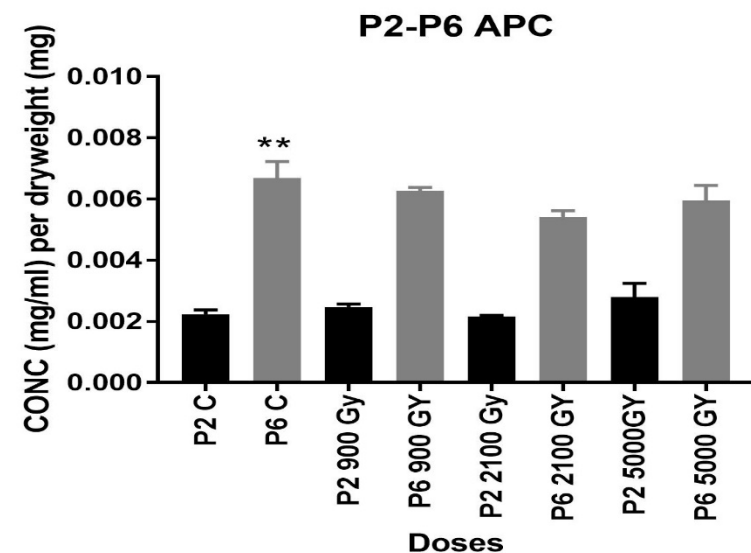

**Fig. S13**

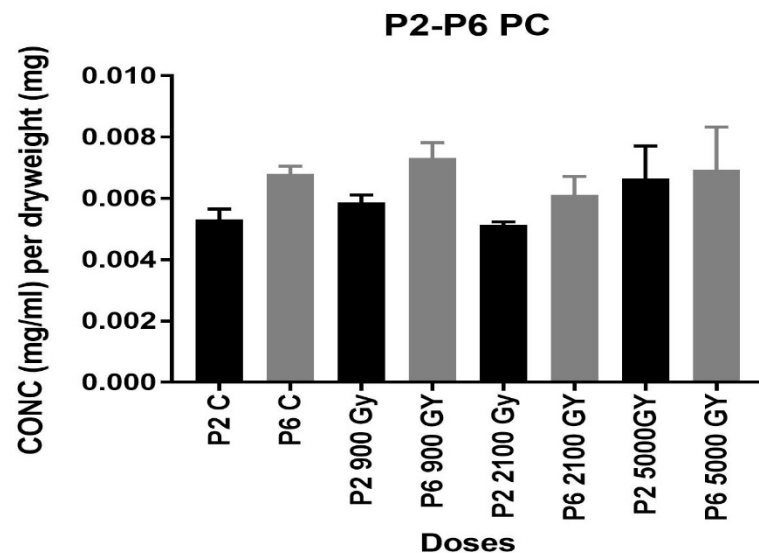

**Table S20**

| Dunn's multiple comparisons test | Mean rank diff, | Significant? | Summary | Adjusted P Value |
|----------------------------------|-----------------|--------------|---------|------------------|
| P2 C vs. P6 C                    | -17,67          | Yes          | **      | 0,0089           |
| P2 900 Gy vs. P6 900 GY          | -11             | No           | ns      | 0,227            |
| P2 2100 Gy vs. P6 2100 GY        | -11,33          | No           | ns      | 0,1986           |
| P2 5000GY vs. P6 5000 GY         | -8              | No           | ns      | 0,6634           |

**Table S21**

| Dunn's multiple comparisons test | Mean rank diff, | Significant? | Summary | Adjusted P Value |
|----------------------------------|-----------------|--------------|---------|------------------|
| P2 C vs. P6 C                    | -11,67          | No           | ns      | 0,1732           |
| P2 900 Gy vs. P6 900 GY          | -9,333          | No           | ns      | 0,4239           |
| P2 2100 Gy vs. P6 2100 GY        | -7,667          | No           | ns      | 0,7368           |
| P2 5000GY vs. P6 5000 GY         | -1,333          | No           | ns      | >0,9999          |

Trehalose

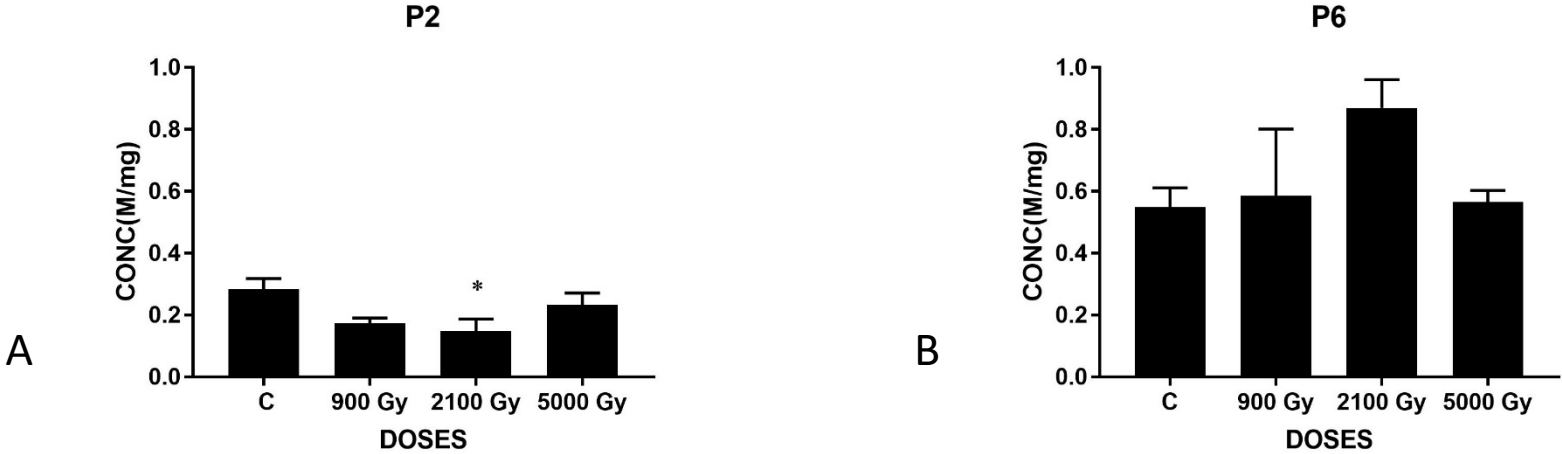

Fig. 12

|                                  |                 |              |                  |
|----------------------------------|-----------------|--------------|------------------|
| P6 TREHALOSE                     |                 |              |                  |
| Dunn's multiple comparisons test | Mean rank diff, | Significant? | Adjusted P Value |
| C vs. 900 Gy                     | 0               | No           | >0,9999          |
| C vs. 2100 Gy                    | -5,667          | No           | 0,1627           |
| C vs. 5000 Gy                    | -0,3333         | No           | >0,9999          |
| P2 TREHALOSE                     |                 |              |                  |
| C vs. 900 Gy                     | 6,667           | No           | 0,0706           |
| C vs. 2100 Gy                    | 7,667           | Yes          | 0,0276           |
| C vs. 5000 Gy                    | 2,333           | No           | >0,9999          |

Table S22

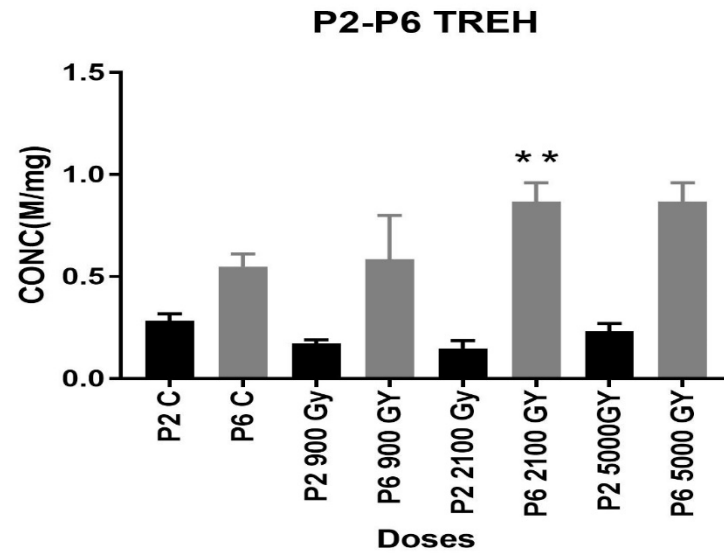

**Fig. S14**

| Dunn's multiple comparisons test | Mean rank diff, | Significant? | Summary | Adjusted P Value |  |
|----------------------------------|-----------------|--------------|---------|------------------|--|
| P2 C vs. P6 C                    | -5              | No           | ns      | >0,9999          |  |
| P2 900 Gy vs. P6 900 GY          | -12             | No           | ns      | 0,1502           |  |
| P2 2100 Gy vs. P6 2100 GY        | -18,17          | Yes          | **      | 0,0066           |  |
| P2 5000GY vs. P6 5000 GY         | -12,83          | No           | ns      | 0,1045           |  |

**Table S23**

**Fig. S15**

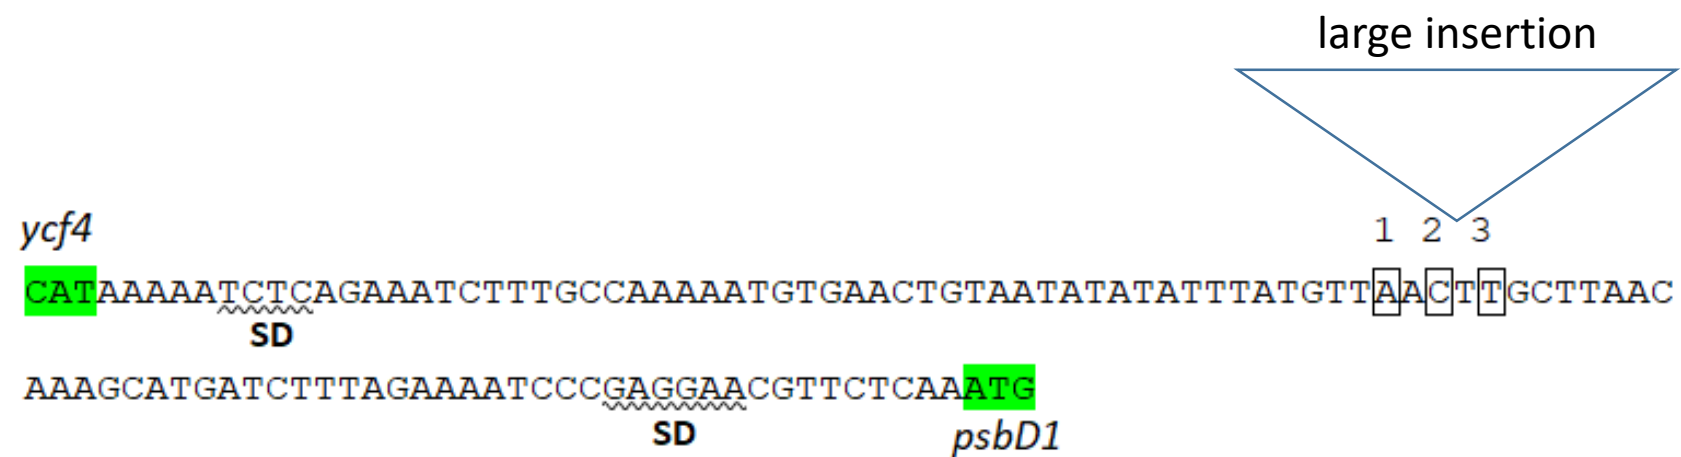

1 = +GTGCGAG

2 = +G

3 = +TAGGAGTGAAATAAGGCTGCAATGCCTGAAATAACCTCCTA

**Fig. S16**

(2100 Gy)

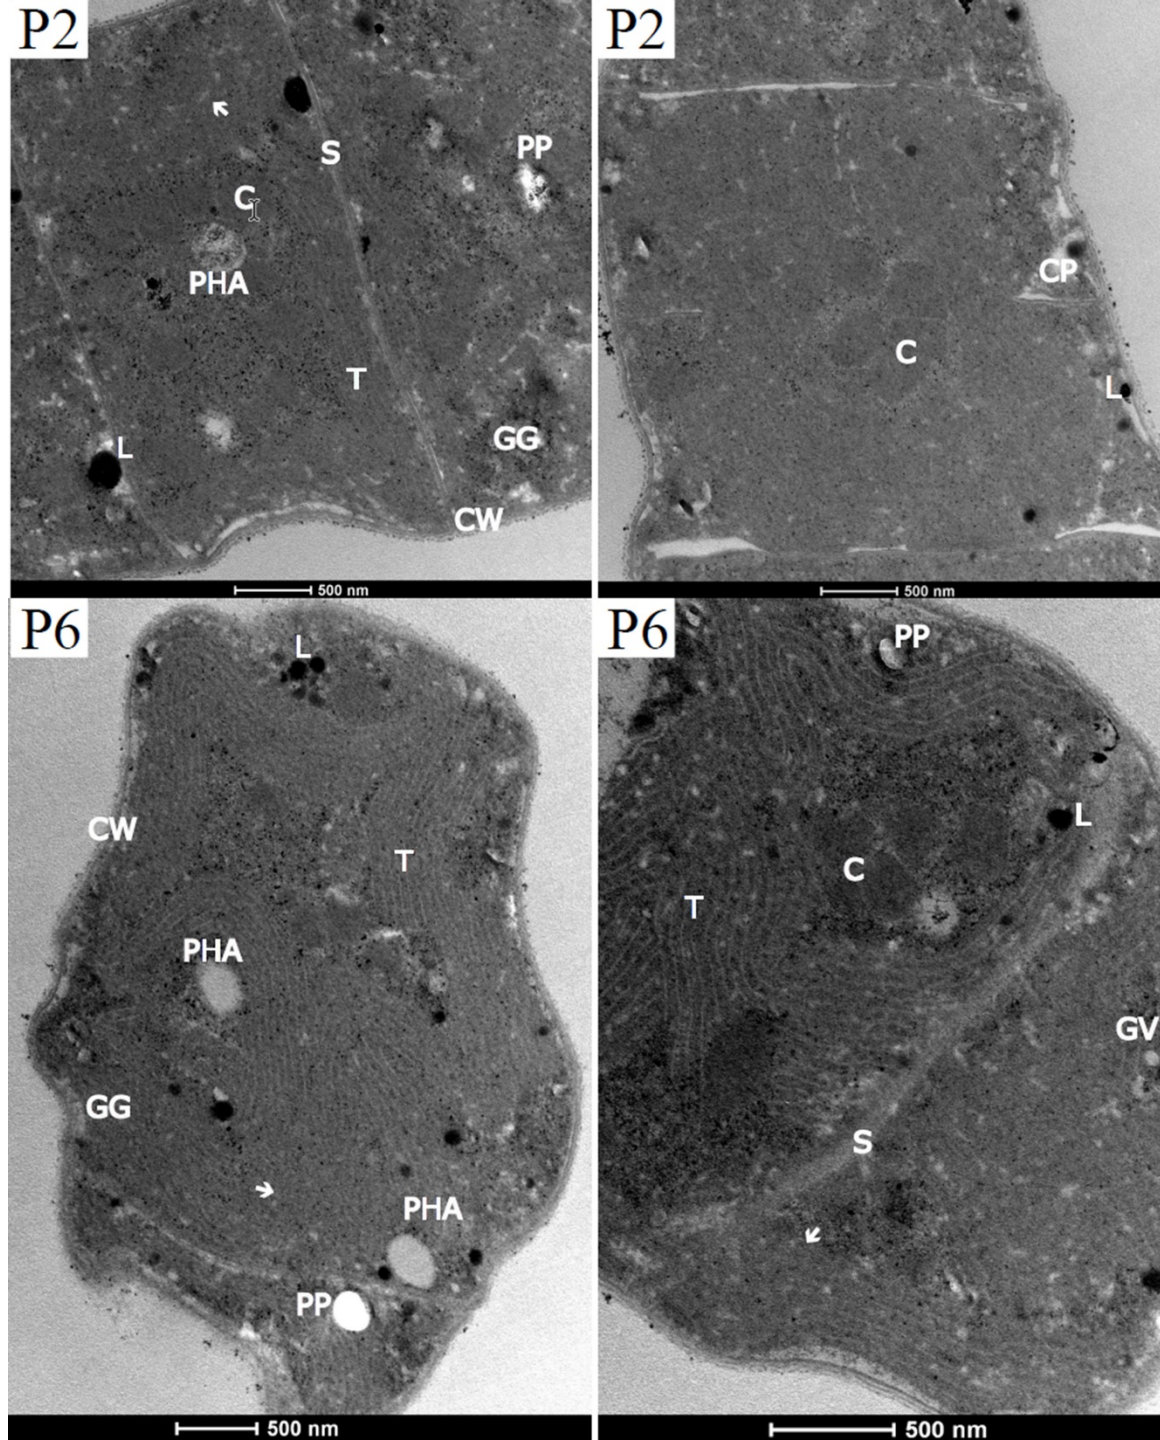

|     |                         |
|-----|-------------------------|
| C   | carboxysome             |
| CP  | cyanophycin             |
| CW  | cell wall               |
| GG  | glycogen granule        |
| GV  | gasvesicle              |
| L   | lipid inclusion         |
| PHA | storage polymers        |
|     | - polyhydroxyalkanoates |
| PP  | polyphosphate           |
| S   | septum                  |
| T   | thylakoid               |

white arrows indicate irradiation  
damage (see text)

**Fig. S17**

(5000 Gy)

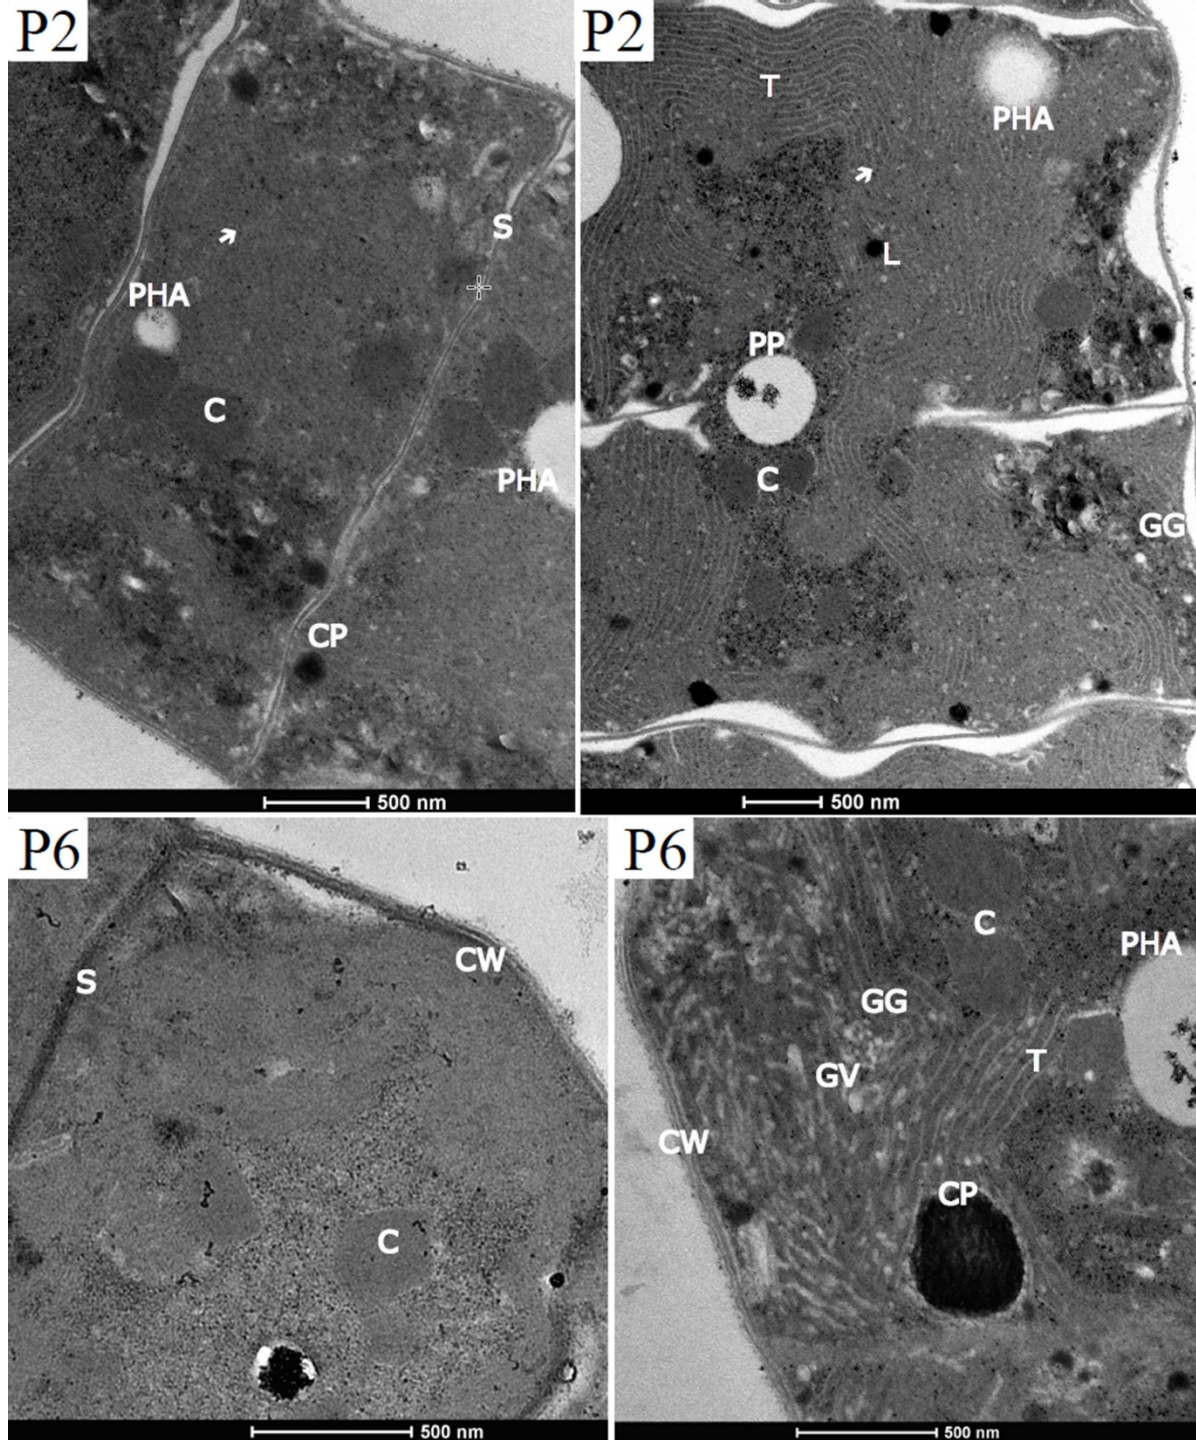

|     |                                             |
|-----|---------------------------------------------|
| C   | carboxysome                                 |
| CP  | cyanophycin                                 |
| CW  | cell wall                                   |
| GG  | glycogen granule                            |
| GV  | gasvesicle                                  |
| L   | lipid inclusion                             |
| PHA | storage polymers<br>- polyhydroxyalkanoates |
| PP  | polyphosphate                               |
| S   | septum                                      |
| T   | thylakoid                                   |

white arrows indicate irradiation  
damage (see text)

**Fig. S18**

(5000 Gy)

C carboxysome  
CW cell wall  
GG glycogen granule  
L lipid inclusion  
S septum  
T thylakoid

P6

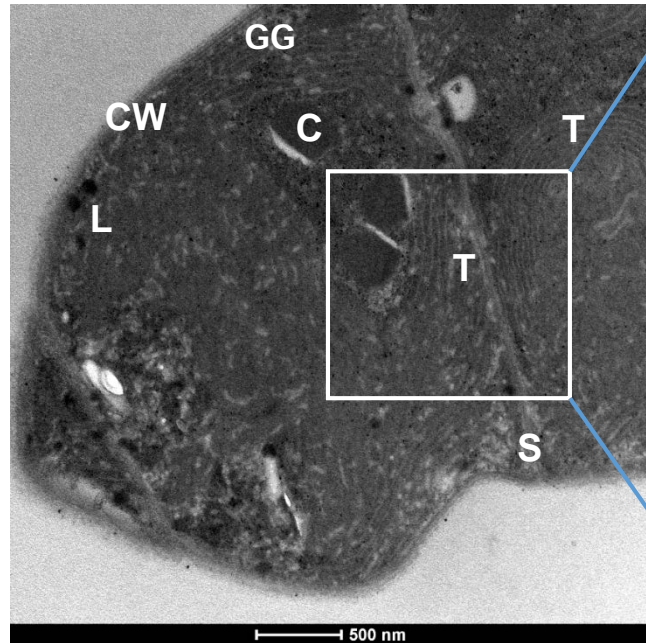

white arrows indicate irradiation damage (see text)

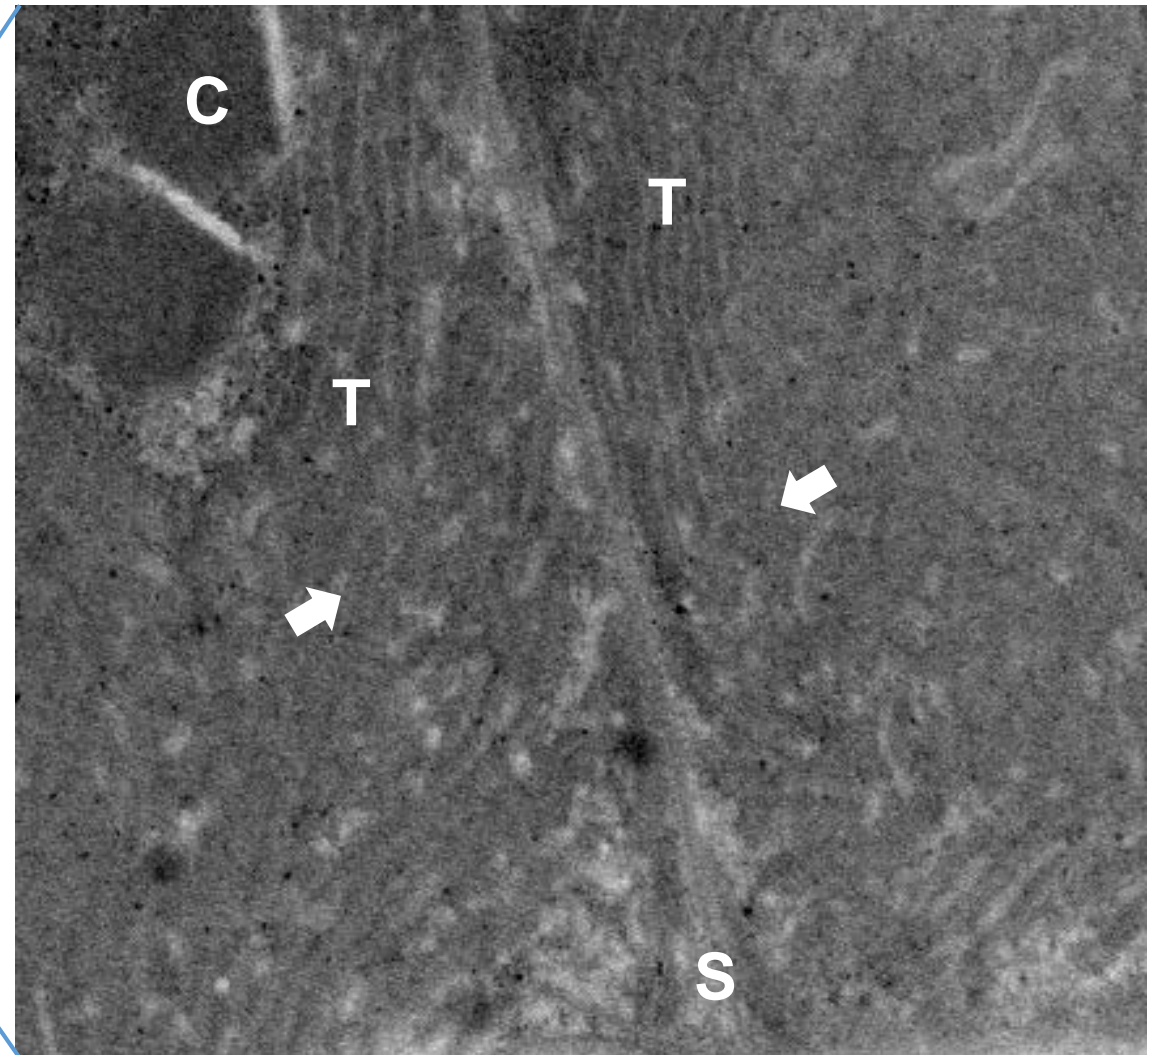

Supplement: Supplementary file 1 [file 1]
